# Supplementary material for: Inhibition of Cdk5 Ameliorates Skeletal Bone Loss in Glucocorticoid-Treated Mice
Source: MDPI journal article supplement (doi:10.3390/biomedicines10020404), 2022-02-08
Supplement: s1 [file s1]

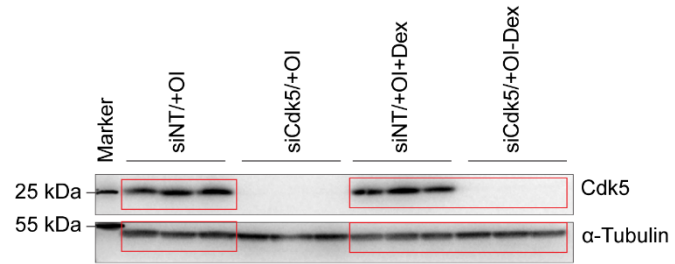

**Figure S1.** Complete western blot related to Figure 1. Portions that were chosen for presentation are marked in red. The siCdk5/+OI group has been cropped in Figure 1B, as shown with the dotted line.
